# Supplementary material
Source: PubMed Central journal article supplement (PMC3475734)
Supplement: NIHMS410942-supplement-1.pdf [file NIHMS410942-supplement-1.pdf]

# Online Supplement

## **Increasing peripheral insulin sensitivity by PTP1B deletion improves control of blood pressure in obesity**

Eric J. Belin de Chantemèle<sup>1,2</sup>, Mohammed. Irfan Ali<sup>1</sup>, James D. Mintz<sup>1</sup>, William E. Rainey<sup>2</sup>, Michel L. Tremblay<sup>4</sup>, David J. Fulton<sup>1,3</sup>, and David W. Stepp<sup>1,2</sup>.

<sup>1</sup>Vascular Biology Center, <sup>2</sup>Department of Physiology, <sup>3</sup>Department of Pharmacology, Georgia Health Sciences University Augusta, GA, USA, <sup>4</sup>Goodman Cancer Center and Department of Biochemistry, McGill University, Montreal, Quebec Canada.

**Short title:** Correction of hypertension in *db/db* mice

**Corresponding author:** David W. Stepp, Ph.D, Georgia Health Sciences University, Vascular Biology Center, [dstepp@georgiahealth.edu](mailto:dstepp@georgiahealth.edu), Phone: +1 706 721 1949, Fax: +1 706 721 9799.

## **Material and Methods**

### **Animal model**

To study the cardiovascular consequences of correcting insulin resistance in obese mice, four groups of mice were generated by crossing obese leptin receptor deficient (*db/db*) mice with mice presenting an increased in insulin sensitivity thanks to the deletion of the molecular restraint of the insulin signaling pathway: the protein tyrosine phosphatase 1B<sup>1, 2</sup> (PTP1B, Goodman Cancer Center of McGill University). Because *db/db* mice are sterile, progeny were generated from dual heterozygotes ( $H_{db}$ , heterozygous for mutant leptin receptor,  $H_{PTP1B}$ , heterozygous for PTP1B gene). As previously described<sup>3</sup>, this breeding strategy yield i) dual heterozygous littermates ( $H_{db}H_{PTP1B}$ ), used as lean control, ii) lean insulin sensitive mice heterozygous for *db* but deficient in PTP1B ( $H_{db}K_{PTP1B}$ ), iii) obese insulin resistant animals deficient in *db* and heterozygous for PTP1B ( $K_{db}H_{PTP1B}$ ) and iii) obese insulin sensitive mice deficient in *db* and PTP1B genes ( $K_{db}K_{PTP1B}$ ). Males only were used for the study. Mice were housed in an American Association of Laboratory Animal Care–approved animal care facility at Georgia Health Sciences University, and the Institutional Animal Care and Use Committee approved all protocols.

### **Metabolic Measurements:**

Fasting blood glucose was assessed using a glucometer (Medisense, Bedford, MA, USA). Plasma total cholesterol, triglycerides and NEFA were assessed with colorimetric assays (Wako, Richmond, VA, USA). Plasma insulin, leptin, T3, T4, PTH, C-Reactive Protein and Resistin levels were determined using colorimetric assays from ALPCO Diagnostics (Salem, NH, USA). Plasma aldosterone levels were measured by radioimmunoassay (Siemens Medical Diagnostic Deerfield, IL)<sup>4</sup>. A different set of mice was used to measure food and water intake as well as urine electrolytes concentration and albuminuria (Elisa kit, ALPCO Diagnostics, Salem, NH, USA). Mice from the 4 groups were placed in metabolic cages. After 3 days of acclimation to the cages, food and water consumption were determined and urine collected for 24 hours.

### **In vivo blood pressure measurement**

At 10-12 weeks of age, mice were instrumented with telemetry transmitters to record blood pressure (BP) and heart rate (PA-C10, Data Sciences, Saint Paul, Minn). Transmitters were implanted as described previously<sup>4, 5</sup>. After 7 to 12 days of recovery from surgery, necessary for the mice to gain their initial body weight, baseline data were recorded for 7 days. After one week of treatment, mice were euthanized. Tissues and plasma were collected for later analysis. Blood pressure values were obtained at 10 minute intervals for the duration of the study. Mean values were collected from 24-hour averages. To assess variability in blood pressure, frequency analysis was performed on 7 complete days of telemetry recording (~1400 pts) and the standard deviation of the data as well as the frequency of blood pressure over 140 mmHg were compared. 140 mmHg was selected as a reference for the limit of autoregulation in many vascular beds and a likely threshold of tissue injury. In a separate set of mice, the carotid artery and jugular vein were catheterized under isoflurane anesthesia to measure BP response to ganglionic blockade, as previously described<sup>5</sup>.

### Renal Morphology

Renal structural alterations were analyzed by the UW Pathology Research Services Laboratory. Briefly, kidneys obtained from H<sub>db</sub>H<sub>PTP1B</sub>, H<sub>db</sub>K<sub>PTP1B</sub>, K<sub>db</sub>H<sub>PTP1B</sub> and K<sub>db</sub>K<sub>PTP1B</sub> mice were immersion-fixed in 10% neutral-buffered formalin. Tissues were embedded in paraffin using standard methods; sectioned (2µm); and stained with silver methenamine. For each animal, section areas were randomly photographed under ×100 magnification. The glomerular cross-sectional area and the amount of silver stained matrix were measured in 15 glomeruli from each animal. The percentage of matrix was calculated using ImagePro Plus image analysis software as described previously<sup>6,7</sup>.

### Reference:

1. Cheng A, Uetani N, Simoncic PD, Chaubey VP, Lee-Loy A, McGlade CJ, Kennedy BP, Tremblay ML. Attenuation of leptin action and regulation of obesity by protein tyrosine phosphatase 1b. *Dev Cell*. 2002;2:497 - 503.
2. Elchebly M, Payette P, Michaliszyn E, Cromlish W, Collins S, Loy AL, Normandin D, Cheng A, Himms-Hagen J, Chan CC, Ramachandran C, Gresser MJ, Tremblay ML, Kennedy BP. Increased insulin sensitivity and obesity resistance in mice lacking the protein tyrosine phosphatase-1b gene. *Science*. 1999;283:1544-1548.
3. Ali MI, Ketsawatsomkron P, Belin de Chantemele EJ, Mintz JD, Muta K, Salet C, Black SM, Tremblay ML, Fulton DJ, Marrero MB, Stepp DW. Deletion of protein tyrosine phosphatase 1b improves peripheral insulin resistance and vascular function in obese, leptin-resistant mice via reduced oxidant tone. *Circ Res*. 2009;105:1013-1022.
4. Belin de Chantemele EJ, Mintz JD, Rainey WE, Stepp DW. Impact of leptin-mediated sympatho-activation on cardiovascular function in obese mice. *Hypertension*. 2011;58:271-279.
5. Belin de Chantemele EJ, Muta K, Mintz J, Tremblay ML, Marrero MB, Fulton DJ, Stepp DW. Protein tyrosine phosphatase 1b, a major regulator of leptin-mediated control of cardiovascular function. *Circulation*. 2009;120:753-763.
6. Hudkins KL, Pichaiwong W, Wietecha T, Kowalewska J, Banas MC, Spencer MW, MÃ¼hlfeld A, Koelling M, Pippin JW, Shankland SJ, Askari B, Rabaglia ME, Keller MP, Attie AD, Alpers CE. Btbr ob/ob mutant mice model progressive diabetic nephropathy. *Journal of the American Society of Nephrology*. 2010;21:1533-1542.
7. Taneda S, Hudkins KL, Cui Y, Farr AG, Alpers CE, Segerer S. Growth factor expression in a murine model of cryoglobulinemia. *Kidney Int*. 2003;63:576-590.
